# Supplementary material for: The growth of highly crystalline, idiomorphic potassium titanoniobate crystals by the cooling of a potassium chloride flux
Source: Royal Society of Chemistry journal article supplement (doi:10.1039/c0ce00080a), 2010-08-03
Supplement: c0ce00080a.pdf [file c0ce00080a.pdf]

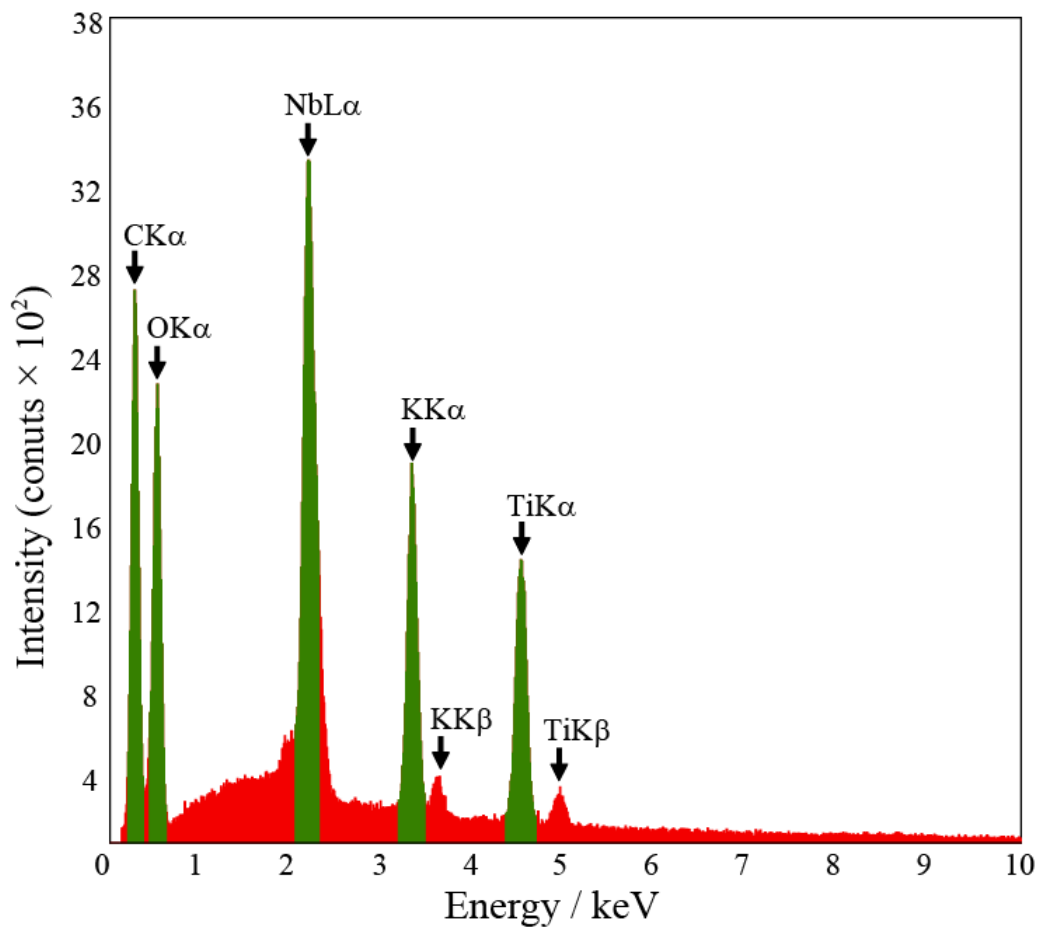

ESI. ESD spectrum of KTiNbO<sub>5</sub> crystals grown at a holding temperature of 1000 °C and a solute concentration of 20 mol%.
